# Supplementary material for: Dibenzofurans and derivatives from lichens and ascomycetes
Source: Royal Society of Chemistry journal article supplement (doi:10.1039/c5np00134j), 2016-01-01
Supplement: c5np00134j1.pdf [file c5np00134j1.pdf]

| Compound  | Sources                                                                                                                                                                              | $[\alpha]_D^{25}$ ;<br>$^{\circ} \cdot \text{dm}^{-1} \cdot \text{g}^{-1} \cdot \text{cm}^3$ | Form                                                                          | UV ; $\lambda_{\text{max}}$ (nm) ( $\epsilon$ (L.mol <sup>-1</sup> .cm <sup>-1</sup> )) | Mass Spectrometry data m/z<br>(relative %) (major fragments)                                                                                                                            | [Lit]               |
|-----------|--------------------------------------------------------------------------------------------------------------------------------------------------------------------------------------|----------------------------------------------------------------------------------------------|-------------------------------------------------------------------------------|-----------------------------------------------------------------------------------------|-----------------------------------------------------------------------------------------------------------------------------------------------------------------------------------------|---------------------|
| <b>1a</b> | <i>Bunodophoron patagonicum</i><br>(acetone extract of ascomata)                                                                                                                     |                                                                                              | Cream crystals from acetone/toluene                                           |                                                                                         | 301* (13), 300 (M <sup>+</sup> , 76), 267 (25)                                                                                                                                          | 42                  |
| <b>1b</b> |                                                                                                                                                                                      |                                                                                              | Cream crystals from dichloromethane/light petroleum                           |                                                                                         | 314* (M <sup>+</sup> , 100), 283 (28), 267 (27).                                                                                                                                        |                     |
| <b>1f</b> |                                                                                                                                                                                      |                                                                                              | Colorless microcrystals from 40% ethyl acetate/5% acetic acid/light petroleum |                                                                                         | 286* (M <sup>+</sup> , 4), 242 (100), 227 (71)                                                                                                                                          |                     |
| <b>1g</b> |                                                                                                                                                                                      |                                                                                              | Pale yellow crystals from dichloromethane/light petroleum                     |                                                                                         | 301* (4), 300 (23), 269 (20), 268 (100), 168 (29), 149 (33), 137 (55).                                                                                                                  | 8                   |
| <b>1c</b> | Cultured mycobiont of <i>Evernia esoredosia</i>                                                                                                                                      |                                                                                              | Cream crystals from acetone/light petroleum                                   | 241 (4.7), 257 (4.5), 309 (4.2) (MeOH)                                                  | EIMS (70eV) 272.0668 [M] <sup>+</sup> , calcd for C <sub>15</sub> H <sub>12</sub> O <sub>5</sub> : 272.0683<br>272 (43), 254 (100), 228 (63), 198 (41)                                  | 40                  |
|           | <i>Bunodophoron patagonicum</i> (ascomata)                                                                                                                                           |                                                                                              |                                                                               |                                                                                         |                                                                                                                                                                                         | 42                  |
|           | Cultured mycobiont of <i>Usnea orientalis</i>                                                                                                                                        |                                                                                              |                                                                               |                                                                                         |                                                                                                                                                                                         | 19                  |
| <b>1e</b> | Cultured mycobiont of <i>Usnea orientalis</i>                                                                                                                                        |                                                                                              | Cream crystals from 10% aqueous acetone                                       | 241 (4.7), 259 (4.6), 309 (4.3) (EtOH)                                                  | EIMS (70eV) 270 (12), 241 (22), 228 (23), 227 (26), 213 (62), 199(35), 185 (100).                                                                                                       | 19                  |
| <b>1d</b> | Cultured mycobiont of <i>Stereocaulon japonicum</i>                                                                                                                                  |                                                                                              | Yellow crystals from benzene/acetone                                          | 241 (4.54), 287 sh (4.05), 372 (3.84) (MeCN)                                            | EIMS (70eV) 286.0482 [M] <sup>+</sup> , calcd for C <sub>15</sub> H <sub>10</sub> O <sub>6</sub> : 286.0477; 286 (26), 268 (67), 242 (100), 213 (38), 128 (27).                         | 41                  |
| <b>2a</b> | <i>Crocynaea membranacea</i> (= <i>Pannaria lanuginosa</i> )<br><i>Lepraria membranacea</i><br><i>Schizopelte californica</i> (= <i>Combea californica</i> )<br><i>Psoroma tenue</i> |                                                                                              | Colorless needles from aqueous acetone                                        | 247 (4.52), 318 (3.92) (MeOH)                                                           | 316* (M <sup>+</sup> ,13), 298 (43),272 (100), 254 (79), 228 (97), 198 (37), 114 (26)                                                                                                   | 8<br>10<br>17<br>21 |
| <b>2b</b> | <i>Schizopelte californica</i> (Syn. <i>Combea californica</i> )<br><i>Roccella hypomecha</i>                                                                                        |                                                                                              | Colorless crystals (EtOAc/ <i>n</i> -hexane)                                  |                                                                                         | EIMS (70 eV) 286 (M-CO <sub>2</sub> , 55), 268 (37), 253 (30), 242 (44),227 (59), 115 (21), 91 (100), 77 (24), 63 (27), 55 (52), 51 (35); positive FAB: m/z 331 (M+H <sup>+</sup> , 26) | 10<br>53            |
| <b>2c</b> | <i>Roccella capensis</i> ,<br><i>Leproloma diffusum</i> , <i>L. vouauxii</i> , <i>Schizopelte californica</i>                                                                        |                                                                                              | Tuft needles (CHCl <sub>3</sub> /MeOH)                                        | 247 (4.78), 275 (4.39), 303 (4.11), 314 (4.03) (MeOH)                                   | 330* (M <sup>+</sup> , 2), 254 (52), 198 (24), 57 (43), 43 (100)                                                                                                                        | 17<br>53            |
| <b>2d</b> | <i>Schizopelte californica</i><br><i>Leproloma vouauxii</i>                                                                                                                          |                                                                                              | Pale buff crystals (acetone/cyclohexane)                                      | 259-264, sh 280-285, sh 305-315 (MeOH)                                                  | 330 (M <sup>+</sup> , 8), 312 (32), 286 (100), 255 (59), 226 (40), 127 (26), 44 (65)                                                                                                    | 42<br>55            |

|           |                                                                                                                                                                        |  |                                                                         |                                                                                    |                                                                                                                                                                                                                          |                |
|-----------|------------------------------------------------------------------------------------------------------------------------------------------------------------------------|--|-------------------------------------------------------------------------|------------------------------------------------------------------------------------|--------------------------------------------------------------------------------------------------------------------------------------------------------------------------------------------------------------------------|----------------|
|           | <i>Leprocaulon tenellum</i>                                                                                                                                            |  |                                                                         |                                                                                    | 8                                                                                                                                                                                                                        |                |
| <b>2e</b> | <i>Roccella capensis</i>                                                                                                                                               |  | Needles from MeOH                                                       |                                                                                    | 371* (96, [M -H ] <sup>-</sup> ), 357 (79), 342 (100), 327 (27), 284 (30), 283 (27), 225 (29).                                                                                                                           | 22             |
| <b>2f</b> | <i>Schizopelte californica</i><br><i>Roccella capensis</i><br><i>Combea mollusca</i>                                                                                   |  | Needles from acetone                                                    | 236 (4.62), 270 (4.29), 286 (4.26), 302 (4.07), 312 (4.12) (MeOH)                  | 358* (M <sup>+</sup> ,100), 327 (40), 311 (20)                                                                                                                                                                           | 17<br>22<br>23 |
| <b>2g</b> | <i>Schizopelte californica</i>                                                                                                                                         |  | Colorless crystals from EtOAc/light petroleum                           |                                                                                    | 358* (M <sup>+</sup> ,100), 327 (17)                                                                                                                                                                                     | 17             |
| <b>2h</b> | <i>Roccella hypomecha</i>                                                                                                                                              |  | Needles from acetone/MeOH                                               |                                                                                    | 344* (M <sup>+</sup> ,19), 312 (100), 147 (26)                                                                                                                                                                           | 24             |
| <b>3</b>  | <i>Lepraria diffusa</i><br>(= <i>Leproloma diffusum</i> )                                                                                                              |  | Buff needles from acetone/cyclohexane                                   |                                                                                    | 346* (M <sup>+</sup> , 0.2), 97 (26), 83 (36), 69 (53), 67 (21), 57 (100)                                                                                                                                                | 18             |
| <b>4a</b> | <i>Cladonia floerkeana</i><br><i>C. squamulosa</i><br><i>C. miniata</i> , <i>C. rangiferina</i><br><i>C. didyma</i> , <i>C. incrassata</i><br><i>Rocella hypomecha</i> |  | Needles from <i>n</i> -hexane                                           | 243 (4.66), 249 (4.59), 256 (4.55), 262 (4.48), 310 (4.28) (MeOH)                  | 370* (M <sup>+</sup> , 2), 342 (74), 326 (25), 324 (87), 299 (74), 298 (100), 283 (30), 269 (62), 254 (53), 241 (53), 228 (53)                                                                                           | 33-36<br>54    |
| <b>4b</b> | <i>C. floerkeana</i> , <i>C. incrassata</i> ,<br><i>C. squamulosa</i> , <i>C. didyma</i>                                                                               |  | White flakes from CHCl <sub>3</sub> /cyclohexane                        |                                                                                    | 399* (12), 398 (M <sup>+</sup> , 45), 381 (28), 380 (100), 354 (41), 267 (20), 258 (21)                                                                                                                                  | 36, 54         |
| <b>4c</b> | <i>Cladonia didyma</i>                                                                                                                                                 |  | Colorless needles from CH <sub>2</sub> Cl <sub>2</sub> /light petroleum |                                                                                    | 370* (M <sup>+</sup> ,18), 352 (35), 326 (100)                                                                                                                                                                           | 36             |
| <b>4d</b> | <i>Cladonia didyma</i><br><i>C. cristatella</i> , <i>C. macilentia</i> ,<br><i>C. strepsilis</i>                                                                       |  | Crystals from CHCl <sub>3</sub> / <i>n</i> -heptane                     |                                                                                    | 342* (M <sup>+</sup> ,35), 324 (100), 298 (26)                                                                                                                                                                           | 10<br>36<br>37 |
| <b>5a</b> | <i>Letrouitia vulpina</i>                                                                                                                                              |  |                                                                         |                                                                                    | HRMS C <sub>20</sub> H <sub>17</sub> ClO <sub>5</sub> M <sup>+</sup> - H <sub>2</sub> O found<br>372.0768/374.0747 calcd<br>372.0765/374.0735<br>EIMS 392 (1.5), 390 (M <sup>+</sup> , 5), 374 (35), 372 (100), 357 (40) | 10, 25         |
| <b>5b</b> | <i>Letrouitia vulpina</i>                                                                                                                                              |  |                                                                         |                                                                                    | HRMS C <sub>22</sub> H <sub>24</sub> O <sub>6</sub> M <sup>+</sup> found 384.1571 calcd<br>384.1573<br>EIMS 384 (M <sup>+</sup> , 42), 366 (100), 340 (25), 296 (43)                                                     | 10, 25         |
| <b>5c</b> | <i>Letrouitia vulpina</i>                                                                                                                                              |  |                                                                         |                                                                                    | HRMS C <sub>22</sub> H <sub>23</sub> ClO <sub>6</sub> M <sup>+</sup> found<br>418.1186/420.1159 calcd<br>418.1183/420.1154<br>EIMS 418 (M <sup>+</sup> , 26), 402 (35), 400 (100)                                        | 10, 25         |
| <b>6a</b> | <i>Phyllopsora haemophaea</i> , <i>P. furfuracea</i>                                                                                                                   |  | Needles from MeOH                                                       | 241 (4.66), S 264 (4.51), 271 (4.53), sh 303 (3.96), 312 (4.08), 338 (3.80) (MeOH) | 468* (M <sup>+</sup> ,6), 450 (100), 424 (20), 352 (80), 334 (40), 307 (46)                                                                                                                                              | 8<br>38        |

|           |                                                             |  |                                          |                                                                                                                |                                                                                                                                                                                                                                                                                                                                                                                                                           |             |
|-----------|-------------------------------------------------------------|--|------------------------------------------|----------------------------------------------------------------------------------------------------------------|---------------------------------------------------------------------------------------------------------------------------------------------------------------------------------------------------------------------------------------------------------------------------------------------------------------------------------------------------------------------------------------------------------------------------|-------------|
| <b>6b</b> | <i>Letrouitia vulpina</i>                                   |  |                                          |                                                                                                                | HRMS C <sub>24</sub> H <sub>24</sub> O <sub>6</sub> M <sup>+</sup> - H <sub>2</sub> O found 408.1576 calcd 408.1573<br>EIMS 426 (M <sup>+</sup> , 12), 409 (24), 408 (87), 338 (55), 320 (38), 293 (30), 265 (70), 252 (20), 71 (100)                                                                                                                                                                                     | 10, 25      |
| <b>6c</b> | <i>Letrouitia vulpina</i>                                   |  |                                          |                                                                                                                | HRMS C <sub>24</sub> H <sub>23</sub> ClO <sub>6</sub> M <sup>+</sup> - H <sub>2</sub> O found 442.1193/444.1171 calcd 442.1183/444.1154<br>EIMS 460 (M <sup>+</sup> , 4), 444 (20), 442 (57), 372 (52), 354 (29), 320 (35), 265 (68), 71 (100)                                                                                                                                                                            | 10, 25      |
| <b>6d</b> | <i>Letrouitia vulpina</i>                                   |  |                                          |                                                                                                                | HRMS C <sub>22</sub> H <sub>22</sub> O <sub>7</sub> M <sup>+</sup> found 398.1370 calcd 398.1366<br>EIMS 398 (M <sup>+</sup> , 56), 354 (28), 326 (25), 310 (100), 292 (43), 265 (87)                                                                                                                                                                                                                                     | 10, 25      |
| <b>6e</b> | <i>Letrouitia vulpina</i>                                   |  |                                          |                                                                                                                | HRMS C <sub>22</sub> H <sub>21</sub> ClO <sub>7</sub> M <sup>+</sup> found 432.0978/434.0955 calcd 432.0976/434.0946<br>EIMS 432 (M <sup>+</sup> , 18), 414 (50), 344 (35), 310 (100)                                                                                                                                                                                                                                     | 10, 25      |
| <b>7a</b> | <i>Cladonia strepsilis</i><br><i>Stereaulocolon azureum</i> |  | Prism or needles from acetic acid        | 242 (4.42), 256 (4.23), sh, 274 (4.06), sh 298 (4.01), 308 (4.10), sh 330 (3.65) (MeOH)                        | EIMS (70 eV), 270 (M <sup>+</sup> , 100), 242 (22), 241 (97), 213 (21), 149 (17), 127 (28).                                                                                                                                                                                                                                                                                                                               | 9<br>26, 27 |
| <b>7b</b> | <i>Alectoria sarmentosa</i>                                 |  | Colorless needles from EtOH/benzene      | 229 sh (4.50), 243 (4.51), 260 (4.45), 295 (4.11), 329 (3.88) 305 (4.17), (MeOH)                               | EIMS 286 (M <sup>+</sup> , 62), 240 (26), 212 (100) 184 (22), 155 (22), 149 (21), 128 (23), 77 (24), 69 (40), 44 (52)                                                                                                                                                                                                                                                                                                     | 26          |
| <b>7c</b> | <i>Haematomma ochroleucum</i>                               |  | Needles from EtOH                        | 247 (4.45), sh 260 (4.32), sh 284 (4.09), 330 (3.57) (MeOH)                                                    | 314* (M <sup>+</sup> ), 298, 270, 241                                                                                                                                                                                                                                                                                                                                                                                     | 8, 9        |
| <b>7d</b> | <i>Psoroma tenue</i>                                        |  | Needles from pyridine/ acetic acid = 1:1 |                                                                                                                | EIMS 328 (M <sup>+</sup> ), 299, 270, 241                                                                                                                                                                                                                                                                                                                                                                                 | 21          |
| <b>8a</b> | Cultured mycobiont of <i>Lecanora iseana</i>                |  | Colorless crystalline solid              | 217.5 (4.26), 229 (4.31), 241.5 sh (4.19), 257.5 sh (3.90), 264.5 (3.93), 298.5 sh (4.00), 306.5 (4.02) (MeOH) | HR-EIMS calc. for C <sub>14</sub> H <sub>11</sub> <sup>35</sup> ClO <sub>3</sub> [M] <sup>+</sup> : 262.0397. Found: 262.0378. Calc. for C <sub>14</sub> H <sub>11</sub> <sup>37</sup> ClO <sub>3</sub> [M] <sup>+</sup> : 264.0368. Found: 264.0377.                                                                                                                                                                     | 43          |
| <b>8b</b> | Cultured mycobiont of <i>Lecanora iseana</i>                |  | Colorless crystalline solid              | 220 (4.41), 232.5 (4.47), 243 sh (4.37), 259 sh (4.01), 267 (4.08), 296 sh (4.12), 302 (4.13) (MeOH).          | HR-EIMS calc. for C <sub>14</sub> H <sub>10</sub> <sup>35</sup> Cl <sub>2</sub> O <sub>3</sub> [M] <sup>+</sup> : 296.0007. Found: 296.0017. Calc. for C <sub>14</sub> H <sub>10</sub> <sup>35</sup> Cl <sup>37</sup> ClO <sub>3</sub> [M] <sup>+</sup> : 297.9978. Found: 297.9935. Calc. for C <sub>14</sub> H <sub>10</sub> <sup>37</sup> Cl <sub>2</sub> O <sub>3</sub> [M] <sup>+</sup> : 299.9948. Found: 299.9931. | 43          |

|            |                                                                                                                                 |  |                             |                                                                                                                             |                                                                                                                                                                                                                                                                                                                                                                                                                                        |          |
|------------|---------------------------------------------------------------------------------------------------------------------------------|--|-----------------------------|-----------------------------------------------------------------------------------------------------------------------------|----------------------------------------------------------------------------------------------------------------------------------------------------------------------------------------------------------------------------------------------------------------------------------------------------------------------------------------------------------------------------------------------------------------------------------------|----------|
| <b>9a</b>  | Cultured mycobiont of <i>Lecanora cinereocarnea</i><br><i>Aspergillus versicolor</i><br>isolated from <i>Lobaria quercizans</i> |  | Colorless crystalline solid | 219 (4.51), 226 (4.52), 239.5 (4.35),<br>257 sh (4.09), 263 (4.12), 302 (4.23),<br>310 (4.23) (MeOH)                        | HR-EIMS calcd for C <sub>14</sub> H <sub>12</sub> O <sub>3</sub><br>[M] <sup>+</sup> : 228.0787. Found: 228.0781.                                                                                                                                                                                                                                                                                                                      | 44<br>49 |
| <b>9b</b>  | Cultured mycobiont of <i>Lecanora cinereocarnea</i>                                                                             |  | Colorless crystalline solid | 205 (4.37), 223 (4.55), 228 (4.57),<br>243 sh (4.35), 263 (4.09), 306.5 (4.25),<br>314.5 (4.25) (MeOH)                      | HR-EIMS calcd for C <sub>14</sub> H <sub>11</sub> <sup>35</sup> ClO <sub>3</sub> [M] <sup>+</sup> :<br>262.0397. Found: 262.0374; calc. for<br>C <sub>14</sub> H <sub>11</sub> <sup>37</sup> ClO <sub>3</sub> [M] <sup>+</sup> : 264.0368. Found:<br>264.0357.                                                                                                                                                                         | 44       |
| <b>9c</b>  | Cultured mycobiont of <i>Lecanora cinereocarnea</i>                                                                             |  | Colorless crystalline solid | 231 (4.60), 245 (4.35), 262.5 (4.02),<br>309 sh (4.27), 317.5 (4.32) (MeOH)                                                 | HR-EIMS calcd. for C <sub>14</sub> H <sub>10</sub> <sup>35</sup> Cl <sub>2</sub> O <sub>3</sub> [M] <sup>+</sup> :<br>296.0007. Found: 296.0016; calc. for<br>C <sub>14</sub> H <sub>10</sub> <sup>35</sup> Cl <sup>37</sup> ClO <sub>3</sub> [M] <sup>+</sup> : 297.9978.<br>Found: 297.9962; calc. for C <sub>14</sub> H <sub>10</sub> <sup>37</sup> Cl <sub>2</sub> O <sub>3</sub><br>[M] <sup>+</sup> : 299.9948. Found: 299.9936. | 44       |
| <b>9d</b>  | Cultured mycobiont of <i>Lecanora cinereocarnea</i>                                                                             |  | Colorless crystalline solid | 219 (4.45), 225.5 (4.46), 239 sh (4.30),<br>257 sh (4.04), 263 (4.07), 300.5 (4.19),<br>308.5 (4.23) (MeOH)                 | HR-EIMS calcd for C <sub>15</sub> H <sub>13</sub> O <sub>3</sub> [M] <sup>+</sup> :<br>242.0944. Found: 242.0961                                                                                                                                                                                                                                                                                                                       | 44       |
| <b>9e</b>  | Cultured mycobiont of <i>Lecanora cinereocarnea</i>                                                                             |  | Colorless crystalline solid | 227 (4.26), 241 sh (4.18), 255 (3.88),<br>263 (3.91), 305 (4.07), 312.5 (4.06);<br>(MeOH)                                   | HR-EIMS calcd. for C <sub>15</sub> H <sub>14</sub> <sup>35</sup> ClO <sub>3</sub> [M] <sup>+</sup> :<br>276.0554. Found: 276.0577; calc. for<br>C <sub>15</sub> H <sub>14</sub> <sup>37</sup> ClO <sub>3</sub><br>[M] <sup>+</sup> : 278.0524. Found: 278.0503.                                                                                                                                                                        | 44       |
| <b>10</b>  | Marine-derived fungus<br><i>Alternaria</i> sp.                                                                                  |  | Yellow amorphous powder     | 338, 260, 238                                                                                                               | HR-ESIMS 289 [M + H] <sup>+</sup> ; 289.0708 (calcd<br>for C <sub>15</sub> H <sub>13</sub> O <sub>6</sub> , 289.0712)                                                                                                                                                                                                                                                                                                                  | 45       |
| <b>11a</b> | Marine sponge-derived<br>ascomycete<br>Super1F1-09                                                                              |  | Yellowish white powder      | 215 (4.11), 266 (4.03), 286 (4.01), 310<br>(4.09) (MeOH)                                                                    | HR-ESIMS 227.0712 [M-H] <sup>-</sup> (calcd for<br>C <sub>14</sub> H <sub>12</sub> O <sub>3</sub> , 227.0714).                                                                                                                                                                                                                                                                                                                         | 46       |
| <b>11b</b> |                                                                                                                                 |  | Yellowish white powder      | 216 (4.11), 267 (4.08), 286 (4.02), 311<br>(4.13) (MeOH)                                                                    | HR-ESIMS 244.0736 [M-H] <sup>-</sup> (calcd for<br>C <sub>14</sub> H <sub>12</sub> O <sub>3</sub> , 243.0663).                                                                                                                                                                                                                                                                                                                         | 46       |
| <b>11c</b> |                                                                                                                                 |  | Yellowish white powder      | 219 (4.13), 260 (4.03), 305 (4.07), 335<br>(4.19) (MeOH)                                                                    | HR-ESIMS 258.0528 [M-H] <sup>-</sup> (calcd for<br>C <sub>14</sub> H <sub>12</sub> O <sub>3</sub> , 257.0455).                                                                                                                                                                                                                                                                                                                         | 46       |
| <b>12a</b> | <i>Aspergillus karnatakaensis</i>                                                                                               |  | Grayish-white solid         | 314.1 (4.07), 301.8 (3.92), 286.9 (4.03),<br>267.1 (4.07), 227.2 (4.45) (MeOH)                                              | EIMS 314 (M <sup>+</sup> , 32), 296 (35), 241 (100)                                                                                                                                                                                                                                                                                                                                                                                    | 48       |
| <b>12b</b> | <i>Aspergillus karnatakaensis</i>                                                                                               |  | White solid                 | 364.5 (2.93), 353.0 (2.94), 346.9 (2.94),<br>313.9 (3.99), 303.4 (3.83), 286.5 (3.98),<br>267.0 (4.04), 227.7 (4.45) (MeOH) | EIMS 296 (M <sup>+</sup> , 83), 241 (100)                                                                                                                                                                                                                                                                                                                                                                                              | 48       |
| <b>13</b>  | <i>Aspergillus versicolor</i><br>isolated from <i>Lobaria quercizans</i>                                                        |  | Brown amorphous solid       | 231 (4.10) (MeOH)                                                                                                           | HR-ESIMS 257.0818 ([M-H] <sup>-</sup> , C <sub>15</sub> H <sub>13</sub> O <sub>4</sub> ;<br>calcd. 257.0808).                                                                                                                                                                                                                                                                                                                          | 49       |
| <b>14</b>  | Unidentified culture                                                                                                            |  |                             |                                                                                                                             | 297 [M+H] <sup>+</sup> , C <sub>19</sub> H <sub>20</sub> O <sub>3</sub>                                                                                                                                                                                                                                                                                                                                                                | 56       |

|                 |                                                                                                           |                                                |                                            |                                                          |                                                                                                                                                                                                |                |
|-----------------|-----------------------------------------------------------------------------------------------------------|------------------------------------------------|--------------------------------------------|----------------------------------------------------------|------------------------------------------------------------------------------------------------------------------------------------------------------------------------------------------------|----------------|
| <b>15a</b>      | <i>Preussia</i> sp. from <i>Enantia chlorantha</i>                                                        |                                                | Yellow amorphous powder                    | 274, 295 and 312 (MeOH)                                  | 345.09688 (calcd for C <sub>18</sub> H <sub>17</sub> O <sub>7</sub> , 345.09743).                                                                                                              | 47             |
| <b>15b</b>      | <i>Preussia</i> sp. from <i>Enantia chlorantha</i>                                                        |                                                | Yellow amorphous powder                    | 273, 293 and 315 (MeOH)                                  | HR-EIMS 331.0812 ; C <sub>17</sub> H <sub>15</sub> O <sub>7</sub> , calcd 331.0817.                                                                                                            | 47             |
| <b>16a, 17a</b> | Various lichens                                                                                           | + 495 or - 495(CHCl <sub>3</sub> , c 1.00)     | Yellow prisms from CHCl <sub>3</sub> -EtOH | 220 (4.44), 290 (4.45), sh 325 (3.85) (EtOH)             | 344* (M <sup>+</sup> , 60), 260 (70), 233 (100), 217 (20)                                                                                                                                      | 8              |
| <b>16b, 17b</b> | (+) from <i>Cladonia mitis</i> and (-) from <i>Cladonia pleurota</i> and <i>Leprocaulon microscopicum</i> | + 495 or - 495(CHCl <sub>3</sub> , c 1.00)     | Yellow prisms from CHCl <sub>3</sub> -MeOH | 232 (4.42), 282 (4.47), 327nm (3.91) (EtOH)              | 344* (M <sup>+</sup> , 62), 260 (100), 233 (83), 217 (38)                                                                                                                                      | 8<br>39<br>59  |
| <b>17c</b>      | <i>Cercosporidium henningsii</i><br><i>Phoma</i> species                                                  | - 26 (CHCl <sub>3</sub> , c 1.6)               | Yellow crystals from EtOAc                 |                                                          | HR-EIMS 331.0691 ; C <sub>16</sub> H <sub>13</sub> NO <sub>7</sub> , calcd 331.0692.<br>EIMS 331 (M <sup>+</sup> , 80), 247 (30), 230 (96), 220 (54), 203 (100)                                | 50<br>51       |
| <b>17d</b>      | <i>Cercosporidium henningsii</i>                                                                          | - 423 (MeCN, c 0.21)                           | Yellow powder from EtOAc                   |                                                          | HR-EIMS 345.0847 ; C <sub>16</sub> H <sub>13</sub> NO <sub>7</sub> , calcd 345.0847.<br>EIMS 346 (M <sup>+</sup> , 8), 345 (47), 261 (21), 244 (77), 234 (48), 217 (100)                       | 11             |
| <b>18</b>       | <i>Parmelia perlata</i>                                                                                   |                                                | Yellow powder from EtOAc                   |                                                          | FAB-MS 346 (M <sup>+</sup> ), 330, 260, 233, 165                                                                                                                                               | 28             |
| <b>19</b>       | <i>Usnea longissima</i>                                                                                   | Data in chinese                                | Data in chinese                            |                                                          | 344 (M <sup>+</sup> ), 328, 260, 233,                                                                                                                                                          | 29             |
| <b>20a</b>      | <i>Stereocaulon alpinum</i><br><i>Ramalina terebrata</i>                                                  | +39 (c 0.77, CH <sub>2</sub> Cl <sub>2</sub> ) | Yellow gum                                 | 297 (4.1), 216 (4.0) (MeOH)                              | HR-EIMS 488.1552 (M +H) <sup>+</sup> ; C <sub>24</sub> H <sub>26</sub> NO <sub>10</sub> , calcd 488.1557.                                                                                      | 30<br>60       |
| <b>20b, 20c</b> | <i>Stereocaulon alpinum</i><br><i>Ramalina terebrata</i>                                                  | +159 (c 0.46, MeOH) or +162 (c 0.43, MeOH)     | Yellow gum                                 | 297 (4.2), 216 (4.3) (MeOH)                              | HR-EIMS 473.1392 or 473.1393 (M +H) <sup>+</sup> ; C <sub>23</sub> H <sub>24</sub> NO <sub>10</sub> , calcd 474.1400.                                                                          | 30<br>60       |
| <b>21a</b>      | <i>Lecanora rubina</i><br><i>Rhizoplaca chrysoleuca</i><br><i>Leprocaulon microscopicum</i>               | - 231 (CHCl <sub>3</sub> , c 0.875)            | Weak yellowish plates from MeOH            | 230 (4.30), 282 (4.45) 337 (3.47) (MeOH)                 | HR-ESIMS 375.1086 C <sub>19</sub> H <sub>19</sub> O <sub>8</sub> (M-H) <sup>-</sup> calcd 375.1085.<br>376* (M <sup>+</sup> , 100), 361 (30), 260 (25), 250 (30), 235 (45), 234 (30), 233 (48) | 31<br>39<br>59 |
| <b>21b</b>      | <i>Rhizoplaca chrysoleuca</i><br><i>Phoma</i> sp                                                          | - 218 (CHCl <sub>3</sub> , c 0.293)            | Yellow prisms from MeOH                    | 205 (3.95), 230 (4.13), 284 (4.33), sh 340 (3.30) (MeOH) | 376* (M <sup>+</sup> , 100), 361, 345, 344, 329, 301, 292, 279, 260, 250, 236, 235, 234, 233, 219, 217, 215, 207, 191, 167, 149, 143, 123, 108, 94                                             | 39<br>50       |
| <b>21c</b>      | <i>Haematomma hilare</i><br><i>Leprocaulon microscopicum</i>                                              |                                                | Yellow powder                              | 229, 277, 346 (MeOH)                                     | 390 (M <sup>+</sup> , 24), [M-C <sub>6</sub> H <sub>6</sub> O <sub>3</sub> ] <sup>+</sup> 264 (40); [M-CH <sub>3</sub> OH-C <sub>5</sub> H <sub>3</sub> O <sub>3</sub> ] <sup>+</sup> 247 (44) | 10             |

|            |                                                                                      |                                              |                                            |                                                                                                                    |                                                                                                                                                           |          |
|------------|--------------------------------------------------------------------------------------|----------------------------------------------|--------------------------------------------|--------------------------------------------------------------------------------------------------------------------|-----------------------------------------------------------------------------------------------------------------------------------------------------------|----------|
| <b>22a</b> | <i>Haematomma flexuosum</i> , <i>H. matogrossense</i><br><i>Mycosphaerella nawae</i> | + 146 (CHCl <sub>3</sub> ,<br><i>c</i> 0.15) | Pale yellow crystals                       | 335 (sh, 3.46), 280 (4.38), 228 (4.23)<br>(MeOH)                                                                   | EIMS 376 (M <sup>+</sup> , 37), 250 (53), 235 (100)                                                                                                       | 32<br>63 |
| <b>22b</b> | <i>Haematomma flexuosum</i> , <i>H. matogrossense</i><br><i>Mycosphaerella nawae</i> | - 91 (CHCl <sub>3</sub> , <i>c</i><br>0.18)  | Pale yellow crystals                       | 223 (4.30), 281 (4.44), 340 (sh, 3.50)<br>(MeOH)                                                                   | HR-EIMS 376.1193 ; C <sub>19</sub> H <sub>20</sub> O <sub>8</sub> , calcd<br>376.1158<br>EIMS 376 (M <sup>+</sup> , 36), 250 (81), 235 (100)              | 32<br>63 |
| <b>22c</b> | <i>Phoma</i> species                                                                 | - 0.006 (MeOH,<br>0.08 g/100 mL)             | Light tan crystals from<br>EtOAc:MeOH, 1:9 | 282 (4.8), 240 (3.7), 204 (5.3) (MeOH)                                                                             | HR-EIMS 390.1324 ; C <sub>20</sub> H <sub>22</sub> O <sub>8</sub> , calcd<br>390.1315<br>EIMS 390 (M <sup>+</sup> , 26), 264 (53), 249 (100),<br>247 (51) | 50       |
| <b>22d</b> | <i>Mycosphaerella nawae</i>                                                          | + 106 (CH <sub>3</sub> CN, <i>c</i><br>0.3)  | Colorless crystals                         | 225 (4.15), 280 (4.40), 340 (sh, 3.36)<br>(MeOH)                                                                   | EIMS 392 (M <sup>+</sup> , 19), 250 (72), 235 (100)                                                                                                       | 50       |
| <b>23a</b> | <i>Lecanora iseana</i>                                                               |                                              | Colorless crystalline<br>solid             | 214.5 (4.51), 228.5 (4.48), 244.5 (4.41),<br>257 (4.41), 264 sh (4.39), 299.5 sh<br>(4.28), 308 (4.31) (MeOH)      | HR-EIMS 454.1414 ; C <sub>28</sub> H <sub>22</sub> O <sub>6</sub> [M] <sup>+</sup> ,<br>calcd 454.1417                                                    | 43       |
| <b>23b</b> | <i>Lecanora iseana</i>                                                               |                                              | Colorless crystalline<br>solid             | 217.5 (4.52), 229.5 (4.54), 242 (4.54),<br>256 sh (4.41), 263.5 sh (4.29), 300.5 sh<br>(4.35), 310.5 (4.40) (MeOH) | HR-EIMS 454.1420 ; C <sub>28</sub> H <sub>22</sub> O <sub>6</sub> [M] <sup>+</sup> ,<br>calcd 454.1417                                                    | 43       |

\* Ionization method for mass spectrometry not indicated

**Table S1.** Sources and physico-chemical properties of dibenzofurans from lichens and ascomycetes.

| Compound*                                 | Microbial strain | Method                                        | Antimicrobial activity                  | [Lit]                                                                                                                                      |                        |
|-------------------------------------------|------------------|-----------------------------------------------|-----------------------------------------|--------------------------------------------------------------------------------------------------------------------------------------------|------------------------|
| 4a                                        | Bacteria         | <i>Staphylococcus aureus</i> Terashima strain | Broth dilution assay                    | Highest dilution at which growth is inhibited : 80,000                                                                                     | 97                     |
|                                           |                  | <i>Escherichia coli communior</i> **          |                                         | NA                                                                                                                                         | 91                     |
|                                           |                  | <i>Staphylococcus aureus</i> COL (MRSA)       | Disk diffusion method (10 mg/mL)        | Inhibition zone: 28 mm                                                                                                                     | 34                     |
|                                           |                  | <i>Enterococcus faecium</i> (Van A) (VRE)     |                                         | Inhibition zone: 22 mm                                                                                                                     |                        |
|                                           |                  | <i>Staphylococcus aureus</i> ATCC 6538        |                                         | Broth microdilution assay (MIC)                                                                                                            | 7.5 µg/mL              |
|                                           | Mycobacteria     | <i>Mycobacterium tuberculosis</i> **          | Broth dilution assay                    | Highest dilution at which growth is inhibited : 40,000                                                                                     | 92                     |
|                                           |                  | <i>Mycobacterium smegmatis</i> ATCC 607       |                                         | Highest dilution at which growth is inhibited : 160,000 (after 3 and 7 days incubation) and 80,000 (14 days incubation)                    |                        |
|                                           |                  | <i>Mycobacterium tuberculosis</i> H37Rv       |                                         | Highest dilution at which growth is inhibited : 20,000 (Sauton's medium, 4 weeks incubation) and < 20,000 (Kirchner's, 3 weeks incubation) |                        |
|                                           | 4b               | Bacteria                                      | <i>Staphylococcus aureus</i> COL (MRSA) | Disk diffusion method (10 mg/mL)                                                                                                           | Inhibition zone: 17 mm |
| <i>Enterococcus faecium</i> (Van A) (VRE) |                  |                                               | Inhibition zone: 22 mm                  |                                                                                                                                            |                        |
|                                           |                  | <i>Staphylococcus aureus</i> ATCC 6538        | Broth microdilution assay (MIC)         | 7.5 µg/mL                                                                                                                                  | 33                     |
| 7a                                        | Bacteria         | <i>Staphylococcus aureus</i> Terashima strain | Broth dilution assay                    | Highest dilution at which growth is inhibited : < 5,000                                                                                    | 97                     |
|                                           | Mycobacteria     | <i>Mycobacterium tuberculosis</i> **          |                                         | Highest dilution at which growth is inhibited : < 10,000                                                                                   |                        |
| 7b                                        | Bacteria         | <i>Staphylococcus aureus</i> ATCC 13709       | Agar-dilution streak methodology        | 25 µg/mL                                                                                                                                   | 26                     |
|                                           |                  | <i>Escherichia coli</i> ATCC 9637             |                                         | NA                                                                                                                                         |                        |
|                                           |                  | <i>Salmonella gallinarum</i> ATCC 9184        |                                         | NA                                                                                                                                         |                        |
|                                           |                  | <i>Klebsiella pneumoniae</i> ATCC 10031       |                                         | NA                                                                                                                                         |                        |
|                                           |                  | <i>Pseudomonas aeruginosa</i> ATCC 27853      |                                         | NA                                                                                                                                         |                        |
|                                           | Mycobacteria     | <i>Mycobacterium smegmatis</i> ATCC 607       |                                         | 25 µg/mL                                                                                                                                   |                        |
|                                           | Yeasts           | <i>Candida albicans</i> ATCC 10231            |                                         | NA                                                                                                                                         |                        |
| 9a                                        | Yeasts           | <i>Candida albicans</i> **                    | Microdilution method                    | 64 µg/mL                                                                                                                                   | 49                     |
| 10                                        | Bacteria         | <i>Staphylococcus aureus</i> **               | Agar diffusion method (MIC)             | 100 µg/mL                                                                                                                                  | 45                     |
| 11a                                       | Bacteria         | <i>Staphylococcus aureus</i> ATCC 29213       | Broth microdilution assay (MIC)         | 50 µg/mL                                                                                                                                   | 46                     |
|                                           |                  | <i>Escherichia coli</i> ATCC 8739             |                                         | NA                                                                                                                                         |                        |

|                 |                                     |                                                       |                                 |                              |     |    |
|-----------------|-------------------------------------|-------------------------------------------------------|---------------------------------|------------------------------|-----|----|
|                 | Mycobacteria                        | <i>Mycobacterium marinum</i> ATCC BAA535              |                                 | 25 µg/mL                     |     |    |
| <b>11b, 11c</b> | Bacteria                            | <i>Staphylococcus aureus</i> ATCC 29213               |                                 | NA                           |     |    |
|                 |                                     | <i>Escherichia coli</i> ATCC 8739                     |                                 | NA                           |     |    |
|                 | Mycobacteria                        | <i>Mycobacterium marinum</i> ATCC BAA535              |                                 | NA                           |     |    |
| <b>12a, 12b</b> | Bacteria                            | <i>Staphylococcus aureus</i> **                       | Agar overlay method             | NA                           | 48  |    |
|                 |                                     | <i>Bacillus subtilis</i> **                           |                                 |                              |     |    |
|                 |                                     | <i>Escherichia coli</i> **                            |                                 |                              |     |    |
|                 |                                     | <i>Pseudomonas aeruginosa</i> **                      |                                 | Weak activity at 100 µg/disk |     |    |
|                 | Fungi                               | <i>Alternaria infectoria</i> **                       |                                 |                              |     | NA |
|                 |                                     | <i>Cladosporium</i> sp.**                             |                                 |                              |     |    |
|                 |                                     | <i>Penicillium italicum</i> **                        |                                 |                              |     |    |
|                 |                                     | <i>Penicillium digitatum</i> **                       |                                 |                              |     |    |
|                 |                                     | <i>Penicillium expansum</i> **                        |                                 |                              |     |    |
|                 |                                     | <i>Aspergillus fumigatus</i> **                       |                                 |                              |     |    |
|                 |                                     | <i>Fusarium avenaceum</i> **                          |                                 |                              |     |    |
|                 |                                     | <i>Fusarium culmorum</i> **                           |                                 |                              |     |    |
|                 |                                     | <i>Fusarium solani</i> **                             |                                 |                              |     |    |
|                 |                                     | <i>Fusarium sporotrichioides</i> **                   |                                 |                              |     |    |
|                 | <i>Fusarium oxysporum</i> **        |                                                       |                                 |                              |     |    |
|                 | <i>Botrytis cinera</i> **           |                                                       |                                 |                              |     |    |
| <b>13</b>       | Yeasts                              | <i>Candida albicans</i> **                            | Microdilution method            | > 64 µg/mL                   | 49  |    |
| <b>14</b>       | Bacteria                            | <i>Staphylococcus aureus</i> supersensitive HS 999    | Broth microdilution assay (MIC) | 2 µg/mL                      | 102 |    |
|                 |                                     | <i>Staphylococcus aureus</i> ATCC 29213               |                                 | 4 µg/mL                      |     |    |
|                 |                                     | <i>Enterococcus faecalis</i> ATCC 27270               |                                 | 2 µg/mL                      |     |    |
|                 |                                     | <i>Streptococcus pneumoniae</i> ATCC 49619            |                                 | > 32 µg/mL                   |     |    |
|                 |                                     | <i>Escherichia coli</i> supersensitive HS 294         |                                 | 32 µg/mL                     |     |    |
|                 |                                     | <i>Escherichia coli</i> ATCC 10536                    |                                 | > 32 µg/mL                   |     |    |
|                 | Yeasts                              | <i>Saccharomyces cerevisiae</i> supersensitive PM 503 |                                 | 1 µg/mL                      |     |    |
|                 |                                     | <i>Candida albicans</i> C 43                          |                                 | 8 µg/mL                      |     |    |
| Fungi           | <i>Aspergillus fumigatus</i> ND 158 | > 32 µg/mL                                            |                                 |                              |     |    |



|                                     |          |                                         |                                             |                    |    |    |
|-------------------------------------|----------|-----------------------------------------|---------------------------------------------|--------------------|----|----|
| 17b                                 | Fungi    | <i>Sclerotium rolsii</i> **             | Poisoned food technique (ED <sub>50</sub> ) | 69.63 ± 0.46 µg/mL | 93 |    |
|                                     |          | <i>Rhizoctonia solani</i> **            |                                             | 64.62 ± 0.46 µg/mL |    |    |
|                                     |          | <i>Rhizoctonia bataticola</i> **        |                                             | 70.36 ± 0.47 µg/mL |    |    |
|                                     |          | <i>Fusarium udum</i> **                 |                                             | 70.86 ± 0.45 µg/mL |    |    |
|                                     |          | <i>Pythium aphanidermatum</i> **        |                                             | 62.30 ± 1.07 µg/mL |    |    |
|                                     |          | <i>Pythium debaryanum</i> **            |                                             | 70.98 ± 0.44 µg/mL |    |    |
| 17c                                 | Bacteria | <i>Staphylococcus aureus</i> ATCC 25923 | Disk diffusion method (MIC)                 | 2.0 µg             | 50 |    |
|                                     |          | <i>Escherichia coli</i> LT 18290-015    |                                             | > 500 µg           |    |    |
|                                     | Fungi    | <i>Pythium ultimum</i> **               | Broth microdilution assay (MIC)             | 3-4 µg/mL          |    | 11 |
|                                     |          | <i>Sclerotinia sclerotiorum</i> **      |                                             | 5-8 µg/mL          |    |    |
|                                     |          | <i>Rhizoctonia solani</i> **            |                                             | 8-10 µg/mL         |    |    |
|                                     |          | <i>Trichophyton rubrum</i> ***          |                                             | 4 µg/mL            |    |    |
|                                     |          | <i>Trichophyton mentagrophytes</i> ***  |                                             | 6 µg/mL            |    |    |
|                                     |          | <i>Trichophyton tonsurans</i> ***       |                                             | 1 µg/mL            |    |    |
|                                     |          | <i>Aspergillus sp.</i> ***              |                                             | 32 µg/mL           |    |    |
|                                     | Yeasts   | <i>Candida albicans</i> ***             | Broth microdilution assay (MIC)             | 81 µg/mL           |    | 11 |
|                                     |          | <i>Candida tropicalis</i> ***           |                                             | 128 µg/mL          |    |    |
|                                     |          | <i>Candida stellatoidea</i> ***         |                                             | 23 µg/mL           |    |    |
|                                     |          | <i>Candida parapsilosis</i> ***         |                                             | 64 µg/mL           |    |    |
|                                     |          | <i>Candida krusei</i> ***               |                                             | 45 µg/mL           |    |    |
| <i>Saccharomyces cerevisiae</i> *** |          | 16 µg/mL                                |                                             |                    |    |    |
| 17d                                 | Fungi    | <i>Trichophyton rubrum</i> ***          | Broth microdilution assay (MIC)             | 4 µg/mL            | 11 |    |
|                                     |          | <i>Trichophyton mentagrophytes</i> ***  |                                             | 3 µg/mL            |    |    |
|                                     |          | <i>Trichophyton tonsurans</i> ***       |                                             | 1 µg/mL            |    |    |
|                                     |          | <i>Aspergillus sp.</i> ***              |                                             | > 512 µg/mL        |    |    |
|                                     | Yeasts   | <i>Candida albicans</i> ***             | Broth microdilution assay (MIC)             | > 512 µg/mL        |    | 11 |
|                                     |          | <i>Candida tropicalis</i> ***           |                                             | > 512 µg/mL        |    |    |
|                                     |          | <i>Candida stellatoidea</i> ***         |                                             | > 512 µg/mL        |    |    |
|                                     |          | <i>Candida parapsilosis</i> ***         |                                             | > 512 µg/mL        |    |    |
|                                     |          | <i>Candida krusei</i> ***               |                                             | > 512 µg/mL        |    |    |
|                                     |          | <i>Candida krusei</i> ***               |                                             | > 512 µg/mL        |    |    |

|                               |          |                                         |                                                                          |                                                                    |    |
|-------------------------------|----------|-----------------------------------------|--------------------------------------------------------------------------|--------------------------------------------------------------------|----|
|                               |          | <i>Saccharomyces cerevisiae</i> ***     |                                                                          |                                                                    |    |
| <b>20a</b>                    | Bacteria | <i>Staphylococcus aureus</i> KCTC 3881  | Disk diffusion assay (inhibition zone) / Broth microdilution assay (MIC) | NA                                                                 | 30 |
|                               |          | <i>Bacillus subtilis</i> KCTC 1022      |                                                                          | Inhibition zone: 27 ± 2.3 mm (30 µg/disk) / MIC: 11.14 ± 0.9 µg/mL |    |
|                               |          | <i>Escherichia coli</i> KCTC 1039       |                                                                          |                                                                    |    |
|                               |          | <i>Pseudomonas aeruginosa</i> KCTC 1636 |                                                                          | NA                                                                 |    |
|                               | Yeasts   | <i>Candida albicans</i> KCTC 7965       |                                                                          |                                                                    |    |
| <b>20b</b>                    | Bacteria | <i>Staphylococcus aureus</i> KCTC 3881  | Disk diffusion assay (inhibition zone) / Broth microdilution assay (MIC) | NA                                                                 | 30 |
|                               |          | <i>Bacillus subtilis</i> KCTC 1022      |                                                                          | Inhibition zone: 22 ± 1.8 mm (30 µg/disk) / MIC: 12.73 ± 1.1 µg/mL |    |
|                               |          | <i>Escherichia coli</i> KCTC 1039       |                                                                          |                                                                    |    |
|                               |          | <i>Pseudomonas aeruginosa</i> KCTC 1636 |                                                                          | NA                                                                 |    |
|                               | Yeasts   | <i>Candida albicans</i> KCTC 7965       |                                                                          |                                                                    |    |
| <b>20c</b>                    | Bacteria | <i>Staphylococcus aureus</i> KCTC 3881  | Disk diffusion assay (inhibition zone) / Broth microdilution assay (MIC) | NA                                                                 | 30 |
|                               |          | <i>Bacillus subtilis</i> KCTC 1022      |                                                                          | Inhibition zone: 20 ± 2.1 mm (30 µg/disk) / MIC: 26.4 ± 2.7 µg/mL  |    |
|                               |          | <i>Escherichia coli</i> KCTC 1039       |                                                                          |                                                                    |    |
|                               |          | <i>Pseudomonas aeruginosa</i> KCTC 1636 |                                                                          | NA                                                                 |    |
| <b>22a</b>                    | Bacteria | <i>Staphylococcus aureus</i> **         | Agar dilution method (MIC)                                               | 6.2 µg/mL                                                          | 42 |
|                               |          | <i>Bacillus subtilis</i> **             |                                                                          | 6.2 µg/mL                                                          |    |
|                               |          | <i>Escherichia coli</i> **              |                                                                          | > 100 µg/mL                                                        |    |
|                               | Yeasts   | <i>Candida albicans</i> **              |                                                                          | 100 µg/mL                                                          |    |
|                               | Fungi    | <i>Trichophyton asteroides</i> **       |                                                                          | 6.2 µg/mL                                                          |    |
| <i>Trichophyton rubrum</i> ** |          | 25 µg/mL                                |                                                                          |                                                                    |    |
| <b>22b</b>                    | Bacteria | <i>Staphylococcus aureus</i> **         | Agar dilution method (MIC)                                               | 6.2 µg/mL                                                          | 52 |
|                               |          | <i>Bacillus subtilis</i> **             |                                                                          | 6.2 µg/mL                                                          |    |
|                               |          | <i>Escherichia coli</i> **              |                                                                          | > 100 µg/mL                                                        |    |
|                               | Yeasts   | <i>Candida albicans</i> **              |                                                                          | 100 µg/mL                                                          |    |
|                               | Fungi    | <i>Trichophyton asteroides</i> **       |                                                                          | 25 µg/mL                                                           |    |
|                               |          | <i>Trichophyton rubrum</i> **           |                                                                          | 25 µg/mL                                                           |    |
|                               |          | <i>Mycosphaerella nawae</i>             | Agar nutrient plate                                                      | Growth inhibition with dosages of 25-50 µg/disc                    |    |
| <b>22c</b>                    | Bacteria | <i>Staphylococcus aureus</i> ATCC 25923 | Disk diffusion method (MIC)                                              | 1.6 µg                                                             | 50 |

|            |          |                                      |                                 |             |    |
|------------|----------|--------------------------------------|---------------------------------|-------------|----|
|            |          | <i>Escherichia coli</i> LT 18290-015 |                                 | > 500 µg    |    |
|            | Fungi    | <i>Pythium ultimum</i> **            | Broth microdilution assay (MIC) | 4-5 µg/mL   |    |
|            |          | <i>Sclerotinia sclerotiorum</i> **   |                                 | 3-5 µg/mL   |    |
|            |          | <i>Rhizoctonia solani</i> **         |                                 | 5-8 µg/mL   |    |
|            |          |                                      |                                 |             |    |
| <b>22d</b> | Bacteria | <i>Staphylococcus aureus</i> **      | Agar dilution method (MIC)      | > 100 µg/mL | 52 |
|            |          | <i>Bacillus subtilis</i> **          |                                 |             |    |
|            |          | <i>Escherichia coli</i> **           |                                 |             |    |
|            | Yeasts   | <i>Candida albicans</i> **           |                                 |             |    |
|            | Fungi    | <i>Trichophyton asteroides</i> **    |                                 |             |    |
|            |          | <i>Trichophyton rubrum</i> **        |                                 |             |    |
|            | Yeasts   | <i>Candida albicans</i> KCTC 7965    |                                 |             |    |

\* Except for (+)-usnic acid and (-)-usnic acid.

\*\* Strains not specified

\*\*\* Several strains tested for each micro-organism (not specified). The MICs are mean values.

NA: not active at tested concentrations

**Table S2.** Antimicrobial activity of some dibenzofurans isolated from lichens and ascomycetes.

| Compound*  | Cell lines           | IC <sub>50</sub> (incubation time)**                      | [Lit] |
|------------|----------------------|-----------------------------------------------------------|-------|
| <b>9a</b>  | PC3                  | 39.4 ± 1.7 μM <sup>c</sup>                                | 49    |
|            | A549                 | > 50 μM <sup>c</sup>                                      |       |
|            | A2780                | > 50 μM <sup>c</sup>                                      |       |
| <b>13</b>  | PC3                  | > 50 μM <sup>c</sup>                                      | 47    |
|            | A549                 | > 50 μM <sup>c</sup>                                      |       |
|            | A2780                | > 50 μM <sup>c</sup>                                      |       |
| <b>15a</b> | L6                   | 106 μM (70h)                                              | 47    |
| <b>15b</b> |                      | 184 μM (70h)                                              |       |
| <b>17b</b> | HT-29                | > 100 μM (48h)                                            | 59    |
| <b>21a</b> | HT-29                | > 100 μM (48h)                                            | 59    |
| <b>21b</b> | L1210                | Growth inhibition: 93% (23h); 94% (46h) <sup>a</sup>      | 94    |
|            | P388                 | T/C = 128% (25 mg/kg); T/C = 122% (50 mg/kg) <sup>b</sup> |       |
|            | Lewis lung carcinoma | T/C = 122% (25 mg/kg); T/C = 106% (50 mg/kg) <sup>b</sup> |       |
| <b>21c</b> | HT-29                | > 100 μM (48h)                                            | 59    |
| <b>22a</b> | MDCK                 | 0.96 μM <sup>c</sup>                                      | 52    |
| <b>22b</b> |                      | 1.22 μM <sup>c</sup>                                      |       |
| <b>22d</b> |                      | 485 μM <sup>c</sup>                                       |       |

\* Except for (+)-usnic acid and (-)-usnic acid.

\*\* All IC<sub>50</sub> are expressed in μM.

<sup>a</sup> Cultured L1210 cells were continuously exposed to compound at ca. 1.4 x 10<sup>-7</sup> mol/mL. Cell counts were made at the end of 23 and 46 h.

<sup>b</sup> Dose-response assays were conducted at dose levels of 200, 100, 50, 25, 12, and 6 (mg/kg)/day. Test compound in gum acacia suspension was administered intraperitoneally to tumored mice on days 1-9 (nine injections). Assays were determined in duplicate. The highest T/C values for each assay, along with associated doses, are recorded in the table. A T/C value of ≥ 125 is considered significantly active, where T/C represents the ratio of the median survival time of the treated animals over those of the control animals expressed as a percentage.

<sup>c</sup> Incubation time not specified

**Table S3.** Cytotoxic activity of some dibenzofurans isolated from lichens and ascomycetes
